# Supplementary material
Source: PubMed Central journal article supplement (PMC4066255)
Supplement: Supp_Data.pdf [file Supp_Data.pdf]

## Supplementary Data

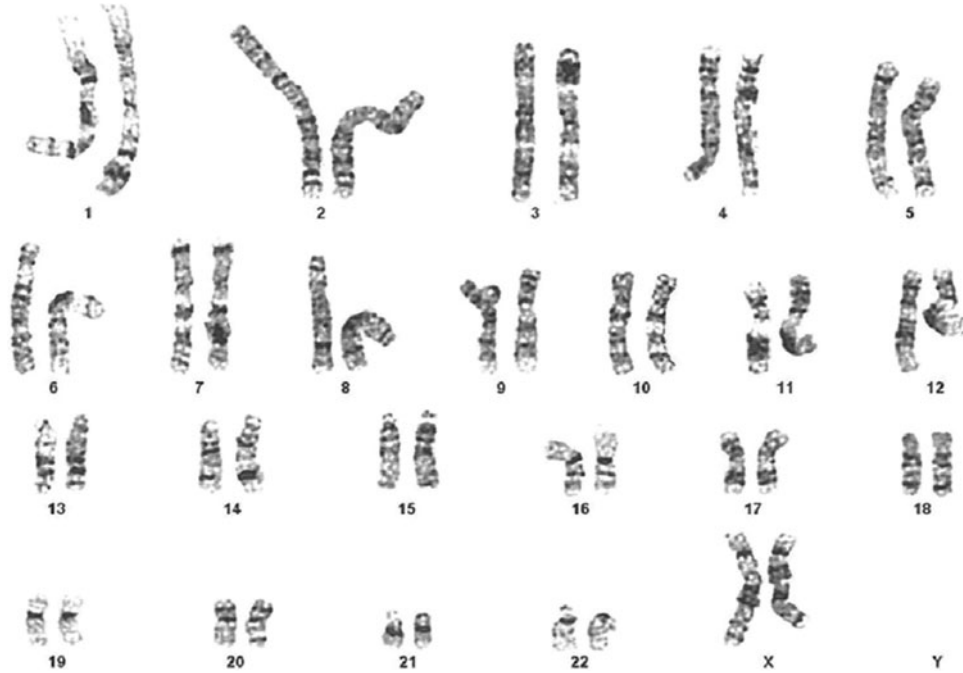

**SUPPLEMENTARY FIG. S1.** Karyotype analysis by G-banding at a 550 banding resolution for all three 23i-SD *TRPV4* clones. Analysis showed a normal 46, XX karyotype for all three 23i clones (n1, n12, and n14) with no evidence of chromosomal rearrangement. The normal karyotype for clone 23i-n14 iPSC is shown. iPSC, induced pluripotent stem cell; SD, skeletal dysplasia.

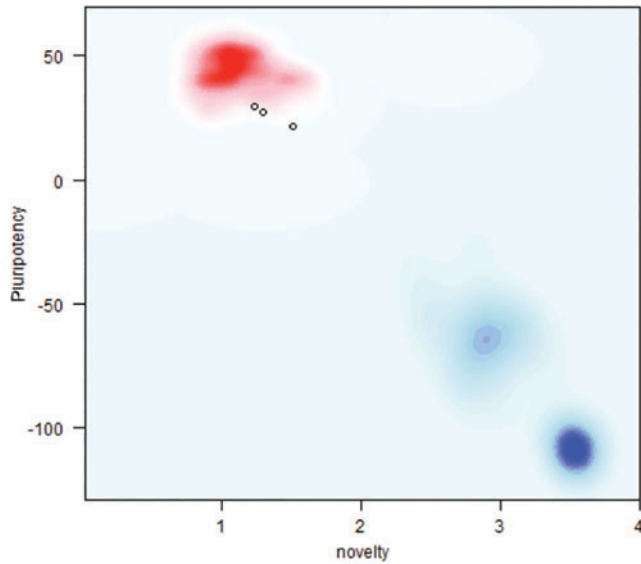

**SUPPLEMENTARY FIG. S2.** Pluripotency assessment of the 23i-SD *TRPV4* iPSC clones. A bioinformatics-based PluriTest assay [3] to determine a pluripotent signature of the 23i clones (n1, n12, and n14) is shown by a graphical depiction of the Novelty score plotted against the Pluripotency Score. The *red* and *blue background* indicate the empirical distribution of human pluripotent iPSCs (*red*) and differentiated cells (*blue*) in the stem cell matrix. The graph compares well-characterized pluripotent lines (*red spot*) and the three 23i-SD clones (*circles*) in a stem cell model matrix. A low Novelty score (see also Table 1) indicates that the 23i-SD iPSC clones are a good fit with karyotypically normal, reproducible signatures from well-characterized pluripotent standard cell lines. The Pluripotency score indicates whether a sample contains an expression signature consistent with pluripotency. However, it does not indicate whether the sample is consistent with a normal genetically stable human iPSC line [3]. Based on these scores, the iPSCs generated here fit the standards associated with pluripotency (*Red cloud area, top left*).

SUPPLEMENTARY TABLE S1. PRIMERS USED FOR qPCR (TOP) AND RT-PCR (BOTTOM) ASSAYS

| Target genes for qPCR | Sequence                                                                         | Product size (bp) | Exons       | RefSeq#             |
|-----------------------|----------------------------------------------------------------------------------|-------------------|-------------|---------------------|
| <i>COL2A1</i> -IIA    | F: 5'-CCCCGCGGTGAGCCATGATT-3'<br>R: 5'-CTGCCAGCCTCTGGACATCCT-3'                  | 112               | 1<br>1-2    | NM_001844.4         |
| <i>COL2A1</i> -IIB    | F: 5'-AGGATGTCCGGCAACCAG-3'<br>R: 5'-TTTGTACCCACGATCCCCCTC-3'                    | 137               | 1-3<br>6    | NM_033150.2         |
| <i>SOX9</i>           | F: 5'-TCTGGAGACTTCTGAACGAGAGCG-3'<br>R: 5'-CTTACCCGACTTCTCCGCCG-3'               | 125               | 1-2<br>2    | NM_000346.6         |
| <i>AGGRECAN</i>       | F: 5'-GACAACCTCGCCTGTGATTGA-3'<br>R: 5'-CCCCTCAGACCCAACTACCA-3'                  | 88                | 14-15<br>15 | NM_001135.3         |
| <i>COL10A1</i>        | F: 5'-ACCTTCTGCACTGCTCATCTGGG-3'<br>R: 5'-ATGGATTCTGCGTGCTGGGAGT-3'              | 87                | 1<br>1-2    | NM_000493.3         |
| <i>RUNX2</i>          | F: 5'-ACCACAAGTGCGGTGCAAAC-3'<br>R: 5'-TGCTTGCAGCCTTAAATGACTCTGT-3'              | 123               | 1<br>1-2    | NM_001015051.3      |
| <i>COL1A1</i>         | F: 5'-AAGGGTAACAGCGGTGAAC-3'<br>R: 5'-AACACCAACAGGGCCAG-3'                       | 81                | 19-20<br>21 | NM_000088.3         |
| <i>GAPDH</i>          | F: 5'-GTATCGTGGAAGGACTCATGACCA-3'<br>R: 5'-TAGAGGCAGGGATGATGTTCTGGA-3'           | 126               | 6-7<br>7    | NM_001256799.1      |
| <i>MSX1</i>           | F: 5'-CGAGAGGACCCCGTGGATGCAGAG-3'<br>R: 5'-GGCGGCCATCTTCAGCTTCTCCAG-3'           | 307               | 1<br>2      | NM_002448.3         |
| <i>PAX6</i>           | F: 5'-TCCTTCTACGGACGGAAGT-3'<br>R: 5'-AGAAATGCCTGAGGAAAGCA-3'                    | 140               | 6<br>7      | NM_000280.4         |
| <i>HAND1</i>          | F: 5'-CATCGCCTACCTGATGGACG-3'<br>R: 5'-TCCCTTTTCCGCTTGCTCTC-3'                   | 114               | 1<br>2      | NM_004821.2         |
| <i>BMP4</i>           | F: 5'-GCGAGAGAGACGCAGACGCA-3'<br>R: 5'-CGGAATGGCTCCATGTTCCCC-3'                  | 86                | 1<br>1-2    | NM_130851.2         |
| <i>AFP</i>            | F: 5'-GAATGCTGCAAACCTGACCACGCTGGAAC-3'<br>R: 5'-TGGCATTCAAGAGGGTTTTTCAGTCTGGA-3' | 281               | 8<br>9      | NM_001134.2         |
| <i>GATA4</i>          | F: 5'-GGCCGCTCATCAAGCCTCAG-3'<br>R: 5'-AAGGAGCTGCTGGTGTCTTA-3'                   | 249               | 3<br>5-6    | NM_002052.3         |
| <i>SOX17</i>          | F: 5'-GTACGCTGTAGACCAGACCG-3'<br>R: 5'-CTCGCCCTCACCTTCATGT-3'                    | 314               | 1<br>1      | NM_0022454.2        |
| <i>TDGF</i>           | F: 5'-TCCTTCTACGGACGGAAGT-3'<br>R: 5'-AGAAATGCCTGAGGAAAGCA-3'                    | 140               | 4<br>5      | NM_001174136.1      |
| <i>EBNA1</i>          | F: 5'-GGTCCCAGAAATCCCCATCC-3'<br>R: 5'-TTCATGGTTCGCTGTCAGACAGA-3'                | 197               | 73n<br>279n | GenBank<br>M13180.1 |
| <i>GAPDH</i>          | F: 5'-GTGGACCTGACCTGCCGTCT-3'<br>R: 5'-GGAGGAGTGGGTGTCGCTGT-3'                   | 153               | 6-7<br>7    | NM_001256799.1      |

The primers were designed with Primer 3 software [1,2] available at [www.ncbi.nlm.nih.gov/tools/primer-blast](http://www.ncbi.nlm.nih.gov/tools/primer-blast), and for the qPCR, at least one primer was located at an exon-exon junction. For each target gene, the product sizes in base pairs, the exon(s) location and the RefSeq (mRNA) accession # are shown.

F, forward primer; R, reverse primer; n, nucleotide where primer starts; RT-PCR, reverse transcription polymerase chain reaction; qPCR, quantitative real-time polymerase chain reaction.

### Supplementary References

- Untergrasser A, I Cutcutache, T Koressaar, J Ye, BC Faircloth, M Remm and SG Rozen. (2012). Primer3—new capabilities and interfaces. *Nucleic Acids Res* 40:e115.
- Koressaar T and M Remm. (2007). Enhancements and modifications of primer design program Primer3. *Bioinformatics* 23:1289–1291.
- Müller FJ, B Brändl and JF Loring. (2012). Assessment of human pluripotent stem cells with PluriTest. *StemBook* [Internet]. Harvard Stem Cell Institute, Cambridge, MA, pp. 1–17.
